# Supplementary material for: A hypothesis on the capacity of plant odorant-binding proteins to bind volatile isoprenoids based on in silico evidences
Source: eLife. 2021 Jun 23;10:e66741. doi: 10.7554/eLife.66741 (PMC8221805; doi:10.7554/eLife.66741)
Supplement: Source data 1. — Related to Table 1, Figure 1 and Figure 1—figure supplement 1. [file elife-66741-data1.xlsx]

## Sheet: UniProt
UniProt Accession number and ID code of 432 Odorant Binding Proteins from animal sources
O02372	OB76A_DROME
Q9NY56	OBP2A_HUMAN
P54191	OB69A_DROME
Q18434	GPA17_CAEEL
Q7TQQ0	O1509_MOUSE
Q9VNB5	ORCO_DROME
B1Q257	GCY10_CAEEL
Q18807	ODR10_CAEEL
Q9PW88	GPC6A_CARAU
Q9V8Y9	OB56H_DROME
P81909	OR22A_DROME
P81910	OR22B_DROME
Q16EI9	OR4_AEDAE
P41933	ODR7_CAEEL
E2BJ30	ORCO_HARSA
Q7QCC7	ORCO_ANOGA
Q60895	OL150_MOUSE
A0A026W182	ORCO_OOCBI
Q8WP90	PBGP9_SOLIN
Q86FX7	GPA17_CAEBR
Q5EP01	PBGP9_SOLMG
Q9D3H2	OBP1A_MOUSE
Q9VT92	OR67D_DROME
Q178U6	ORCO_AEDAE
P23275	OLF15_MOUSE
P08937	OBP_RAT
Q9NPH6	OBP2B_HUMAN
P81917	OR43A_DROME
Q9VHQ7	OR85B_DROME
P81921	OR47A_DROME
A2AEP0	OBP1B_MOUSE
P81912	OR23A_DROME
Q9V3N2	OR46B_DROME
P81919	OR46A_DROME
Q5U9X3	GPC6A_DANRE
A9LKE4	PBGP9_SOLQU
Q9VNB3	OR83A_DROME
P81918	OR43B_DROME
Q5ENZ1	PBGP9_SOLSV
P81245	OBP_PIG
P54193	OB83A_DROME
P81923	OR59A_DROME
A9LKF0	PBGP9_SOLRI
Q8WTE7	OR1_ANOGA
Q8WTE6	OR2_ANOGA
Q86BF9	OB59A_DROME
O46077	OR2A_DROME
P81915	OR33B_DROME
Q9VAI6	OB99B_DROME
Q9W1P8	OR59B_DROME
Q5EP12	PBGP9_SOLGE
Q9VT08	OR67A_DROME
Q9V3Q2	OR35A_DROME
Q9V9I2	OR42A_DROME
P51875	GNAO_CAEEL
Q9W5G6	OR1A_DROME
P24394	IL4RA_HUMAN
P81914	OR33A_DROME
P81916	OR33C_DROME
A8XC92	ODR10_CAEBR
Q9V8Y2	OB56A_DROME
Q8VEZ0	OL480_MOUSE
P81924	OR85E_DROME
Q9V9I4	OR42B_DROME
P81922	OR47B_DROME
P82986	OR82A_DROME
P54192	OB19D_DROME
Q9V6A9	OR49A_DROME
Q9V6H2	OR49B_DROME
P34985	OL143_MOUSE
Q9V8Y7	OR56A_DROME
Q9VHE6	OR85F_DROME
Q9VHS4	OR85A_DROME
Q9W3I5	OR7A_DROME
P81911	OR22C_DROME
P81913	OR24A_DROME
Q9VYZ1	OR10A_DROME
Q9VAZ3	OR98A_DROME
Q9VAJ4	OB99A_DROME
P34170	OBP2_BOMMO
Q60882	OL145_MOUSE
P31419	OBP2_MANSE
P31418	OBP1_MANSE
C0HJA7	OBP1_RABIT
O76584	GPA11_CAEEL
Q9VR94	OB19A_DROME
P54194	OB84A_DROME
Q8MMF9	OB57D_DROME
P34171	OBP1_BOMMO
Q9W2U9	OR9A_DROME
Q9VT90	OR67C_DROME
A9LKF6	PBGP9_SOLMC
Q9I816	OR19A_DROME
Q9VHQ6	OR85C_DROME
Q9VCS9	OR94A_DROME
Q9VXL0	OR13A_DROME
P07435	OBP_BOVIN
P38406	GNAL_RAT
Q60884	OL146_MOUSE
P82982	OR65A_DROME
Q60886	OL147_MOUSE
Q5EP06	PBGP9_SOLEE
Q5EP05	PBGP9_SOLDA
Q9VFN2	OR88A_DROME
Q5EP07	PBGP9_SOLPU
Q9VU27	OR69A_DROME
Q60893	OL151_MOUSE
P82985	OR69B_DROME
Q8K1H9	OBP2A_MOUSE
Q23970	PBP6_DROME
C0HJA9	OBP3_RABIT
Q9V568	OR45A_DROME
Q9VT20	OR67B_DROME
Q9VVF3	OR74A_DROME
Q60894	OLF12_MOUSE
Q9VLE5	OR30A_DROME
Q9V589	OR45B_DROME
Q9VZW8	OR63A_DROME
Q9VCS8	OR94B_DROME
P34983	O1537_MOUSE
P54195	OB28A_DROME
Q8SY61	OB56D_DROME
Q60885	OLF9_MOUSE
P59827	BPIB4_HUMAN
Q9VNK9	OR83C_DROME
C0HJA6	OBP2_RABIT
Q86DA5	SARM1_CAEEL
Q17075	OBP2_ANTPE
Q9H902	REEP1_HUMAN
P59826	BPIB3_HUMAN
Q9W1P7	OR59C_DROME
P81647	OBP1_HYSCR
P81648	OBP2_HYSCR
O62305	KCC2D_CAEEL
Q9BRK0	REEP2_HUMAN
Q21029	NSY1_CAEEL
S5ZYD3	OBP_PHOSU
Q9V938	OB57E_DROME
P34982	OR1D2_HUMAN
Q9VUK5	OR71A_DROME
Q9VHQ2	OR85D_DROME
Q95VF0	PBP2_EPIPO
Q50EX6	ODO1_PETHY
Q16S34	OBP45_AEDAE
Q95VP3	GOBP1_EPIPO
Q95VP2	GOBP2_EPIPO
P51839	GUC2D_RAT
Q5TYJ0	OBP71_ANOGA
O70191	ATF5_MOUSE
P63018	HSP7C_RAT
O76360	EGL4_CAEEL
P07154	CATL1_RAT
G5EDF7	SEK1_CAEEL
P21932	ADCY3_RAT
Q9NFU0	FMR1_DROME
P46580	ANM5_CAEEL
Q8I4N4	DAF11_CAEEL
Q8VGS3	O1019_MOUSE
Q96DX8	RTP4_HUMAN
Q8CFW1	ANO2_MOUSE
Q9NQ90	ANO2_HUMAN
Q5EP08	PBGP9_SOLXY
Q5EP17	PBGP9_SOLS1
Q5EP14	PBGP9_SOLTR
Q5EP16	PBGP9_SOLNG
Q5ENZ7	PBGP9_SOLSB
Q5ENZ6	PBGP9_SOLS0
Q5QGT7	RTP2_HUMAN
Q9VDM1	OR92A_DROME
Q5EP15	PBGP9_SOLSU
Q5EP04	PBGP9_SOLSJ
Q9H6H4	REEP4_HUMAN
P82983	OR65B_DROME
Q8IRZ5	OR19B_DROME
P82984	OR65C_DROME
Q7K4Y6	DAT_DROME
Q9VAW0	OR98B_DROME
P87508	OBP1_ANTPE
Q9XZS8	ATF3_DROME
Q9V931	OB57C_DROME
Q8MKJ4	OB57B_DROME
Q8MKK0	OB57A_DROME
P04905	GSTM1_RAT
Q64625	GPX6_RAT
P08010	GSTM2_RAT
O60266	ADCY3_HUMAN
Q8VHH7	ADCY3_MOUSE
P70377	FGF13_MOUSE
P50281	MMP14_HUMAN
Q00195	CNGA2_RAT
A0A0U1RPR8	GUC2D_MOUSE
Q9ERW3	FGF13_RAT
P00786	CATH_RAT
Q64338	PDE1C_MOUSE
Q27377	OB10_DROME
P53690	MMP14_MOUSE
O60911	CATL2_HUMAN
A7UR17	OBP72_ANOGA
Q8BGH4	REEP1_MOUSE
Q10739	MMP14_RAT
Q63257	IL4RA_RAT
Q64359	CNGA4_RAT
Q02955	IL1R1_RAT
Q63421	PDE1C_RAT
Q14123	PDE1C_HUMAN
Q16280	CNGA2_HUMAN
O35548	MMP16_RAT
Q9VET0	NPF_DROME
Q8NGS4	O13F1_HUMAN
Q9VVL1	IR75A_DROME
Q7TN78	ACSM4_RAT
Q62398	CNGA2_MOUSE
Q7Q5L4	OBP70_ANOGA
A0NBD9	OBP66_ANOGA
F5HK49	OBP69_ANOGA
Q5TXN1	OBP67_ANOGA
Q8IV77	CNGA4_HUMAN
A0NAZ8	OBP68_ANOGA
O44857	NEPL2_CAEEL
Q9NVN3	RIC8B_HUMAN
Q8NGH5	O56A1_HUMAN
Q8NGH8	O56A4_HUMAN
Q95VE9	PBP1_EPIPO
Q8NG75	OR5T1_HUMAN
P51485	ARRB_CAEEL
Q5QNP2	TA13C_DANRE
Q9X839	CYC2_STRCO
Q27288	OBP2_HELVI
Q27226	OBP1_HELVI
P20797	PBP_ANTPO
Q8WZ84	OR8D1_HUMAN
P34172	OBP_HYACE
P34169	OBP_ANTPO
P34173	OBP_LYMDI
P0C7T3	O56A5_HUMAN
Q05701	BPIB3_RAT
Q27597	NCPR_DROME
P34174	PBP_BOMMO
A9LKE6	PBGP9_SOLSX
Q7KF17	PBGP9_SOLAU
Q8WP92	PBGP9_SOLAM
Q8WRP6	PBGP9_SOLGI
Q8WRQ4	PBGP9_SOLIT
P18959	PBP_MANSE
Q8VCD6	REEP2_MOUSE
Q8WZ94	OR5P3_HUMAN
Q3UW12	CNGA4_MOUSE
Q8NGV6	OR5H6_HUMAN
P54185	OBA5_DROME
Q9BQQ7	RTP3_HUMAN
Q9GZM6	OR8D2_HUMAN
A2BGH0	BPIB4_MOUSE
Q27018	B2_TENMO
Q28718	CNGA2_RABIT
P18153	ALL2_AEDAE
Q8VFX2	O1444_MOUSE
Q8VFL5	O1030_MOUSE
Q8VGR8	O1052_MOUSE
Q8VF76	OL998_MOUSE
P37072	OLF6_CHICK
A6NMS3	OR5K4_HUMAN
Q8NGL2	OR5L1_HUMAN
Q8NGL0	OR5L2_HUMAN
Q8NGP4	OR5M3_HUMAN
Q8NGQ5	OR9Q1_HUMAN
Q8NGG6	OR8BC_HUMAN
Q8NG78	OR8G5_HUMAN
Q8NH89	O5AK3_HUMAN
Q8VGI4	OL476_MOUSE
P37068	OLF2_CHICK
Q8NGP8	OR5M1_HUMAN
P0DMU2	OR83P_HUMAN
Q8NGF7	OR5BH_HUMAN
Q8NGP2	OR8J1_HUMAN
Q8NGW1	OR6B3_HUMAN
Q80ZU7	BPIB3_MOUSE
A6NDH6	O5H15_HUMAN
Q8NHC7	O14CZ_HUMAN
Q9Z1V0	OLF49_MOUSE
Q8VFD1	OL492_MOUSE
Q8NH10	OR8U1_HUMAN
Q05704	BPIB4_RAT
Q9F1Y6	MIBS_STRCO
Q6IF36	O8G2P_HUMAN
Q8VG02	OL488_MOUSE
Q8NGI8	O5AN1_HUMAN
Q8NGC0	O5AU1_HUMAN
Q8NGQ1	OR9G4_HUMAN
Q17078	PBP2_ANTPE
Q9ER80	RTP4_MOUSE
O95221	OR5F1_HUMAN
P0DN80	OR5H8_HUMAN
Q96RC9	OR8B4_HUMAN
Q8NGG1	OR8J2_HUMAN
Q8K072	REEP4_MOUSE
Q80ZG0	RIC8B_RAT
Q8VFK2	O1002_MOUSE
P81285	OBPA_MAMBR
P37070	OLF4_CHICK
Q13606	OR5I1_HUMAN
Q8NH85	OR5R1_HUMAN
Q99KK1	REEP3_MOUSE
Q8NGL4	OR5DD_HUMAN
Q8NH51	OR8K3_HUMAN
Q03041	CNGA2_BOVIN
Q8NGI9	OR5A2_HUMAN
Q8N0Y5	OR8I2_HUMAN
Q6IFH4	OR6B2_HUMAN
P0C628	O5AC1_HUMAN
Q8VFD0	OL486_MOUSE
P0C7N5	OR8U9_HUMAN
Q8NGV7	OR5H2_HUMAN
Q8NH48	OR5B3_HUMAN
Q8NGG4	OR8H1_HUMAN
Q96R54	O14A2_HUMAN
Q8VEX6	OL187_MOUSE
A6NET4	OR5K3_HUMAN
Q8NH50	OR8K5_HUMAN
Q8NGR1	O13A1_HUMAN
Q8VG04	OL478_MOUSE
Q60880	OL141_MOUSE
Q7TS48	OL180_MOUSE
Q98913	OLF8_CHICK
Q8NGK9	OR5DG_HUMAN
Q15617	OR8G1_HUMAN
P34176	PBP1_LYMDI
Q9UGF5	O14J1_HUMAN
Q8VF12	OL495_MOUSE
A6ND48	O14I1_HUMAN
Q9TU99	OR1G1_PANTR
Q8WZ92	OR5P2_HUMAN
Q8NH69	OR5W2_HUMAN
Q8NGF6	O10W1_HUMAN
Q8VGR9	O1044_MOUSE
Q8VG03	OL482_MOUSE
Q8VG05	OL483_MOUSE
Q8VG42	OL508_MOUSE
A6NKK0	OR5H1_HUMAN
P0C617	O5AL1_HUMAN
Q8NHC5	O14AG_HUMAN
Q8VFK7	O1020_MOUSE
A6NHG9	O5H14_HUMAN
Q8NHB7	OR5K1_HUMAN
Q8VFK1	O1009_MOUSE
Q80ZI2	RTP2_MOUSE
Q8NH90	O5AK2_HUMAN
Q8NGQ6	OR9I1_HUMAN
Q96RB7	OR5MB_HUMAN
Q8N146	OR8H3_HUMAN
P34177	PBP2_LYMDI
Q8VFL9	O1086_MOUSE
Q8VEW5	OL493_MOUSE
Q8VGQ7	OL181_MOUSE
Q8NGL3	OR5DE_HUMAN
Q6NUK4	REEP3_HUMAN
Q5PQN0	NCALD_RAT
Q9QY00	OL154_MOUSE
Q9TU89	OR3A1_GORGO
Q8NGP3	OR5M9_HUMAN
Q8NGG0	OR8J3_HUMAN
P59025	RTP1_HUMAN
Q8VFD3	OL484_MOUSE
Q8VGS1	O1038_MOUSE
Q8VGI5	OL481_MOUSE
Q9TU86	OR1G1_GORGO
Q8NGI7	O10V1_HUMAN
Q8NGP9	O5AR1_HUMAN
Q8VG09	OL502_MOUSE
Q8VEX5	OL186_MOUSE
Q8VGK5	OLF50_MOUSE
Q8NGP6	OR5M8_HUMAN
Q96RD0	OR8B2_HUMAN
A6NL26	OR5BL_HUMAN
Q80XE1	RIC8B_MOUSE
Q7TR96	O1013_MOUSE
Q8VF65	OL470_MOUSE
Q8VG13	OL507_MOUSE
Q8NH18	OR5J2_HUMAN
O95371	OR2C1_HUMAN
Q15620	OR8B8_HUMAN
Q8NGQ4	O10Q1_HUMAN
Q8NGZ2	O14K1_HUMAN
P23268	O1082_RAT
Q8VG07	OL494_MOUSE
Q8VEW2	OL498_MOUSE
Q96R09	OR5B2_HUMAN
P34175	PBP_HYACE
Q8NGE7	OR9K2_HUMAN
Q8VG06	OL491_MOUSE
Q8VEW6	OL510_MOUSE
Q9TUA8	OR1D2_PANTR
Q17077	PBP1_ANTPE
Q8NGX0	O11L1_HUMAN
Q9NZP5	O5AC2_HUMAN
Q8VFD2	OL490_MOUSE
Q8NGL1	OR5DI_HUMAN
Q8NGJ0	OR5A1_HUMAN
Q8N127	O5AS1_HUMAN
Q95154	OLF1_CANLF
Q6IEU7	OR5MA_HUMAN
Q8NGE9	OR9Q2_HUMAN
Q95155	OLF2_CANLF
Q8VG08	OL497_MOUSE
Q8VGI6	OL477_MOUSE
P37069	OLF3_CHICK
Q8NGG7	OR8A1_HUMAN
Q9QXU1	MSP_MESAU
Q99MG7	FLP_MESAU
Q8VF66	OL469_MOUSE
P37071	OLF5_CHICK
P37067	OLF1_CHICK
P0C7N1	OR8U8_HUMAN
Q8NHB8	OR5K2_HUMAN
Q8NGG8	OR8B3_HUMAN
Q8N162	OR8H2_HUMAN
Q8NGG5	OR8K1_HUMAN
Q8C8C1	RTP1_MOUSE
Q5QGU6	RTP3_MOUSE
Q8VFB9	OL183_MOUSE
Q98914	OLF9_CHICK
P0C626	OR5G3_HUMAN
Q96R08	OR5BC_HUMAN
Q27388	PBP_HELVI
P23267	OL287_RAT
P34178	PBP_ORGPS
Q8NHC6	O14L1_HUMAN
Q8NGF4	O5AP2_HUMAN
Q8VFV4	O1440_MOUSE
Q8NGR4	OR5C1_HUMAN
Q8NGM9	OR8D4_HUMAN
Q9NH75	VA4_SOLGE
Q27017	B1_TENMO

## Sheet: PDB 
PDB Accession number of 9 protein structures of putative Odorant Binding Proteins of plant sources
4dsb	ABA Receptor from Arabidopsis thaliana
3ebl	GA receptor GID1 from Oryza sativa
1wkp	Flowering locus t (FT) from Arabidopsis thaliana
1wko	Terminal flower 1 (tfl1) from Arabidopsis thaliana
3axv	Protein Heading date DATE 3A from Oryza sativa
5nqs	TPL-like protein from Arabidopsis thaliana
3ogl	COI (partial JA receptor) from Arabidopsis thaliana
3ogl	COI & JAZ (JA receptor complete) from Arabidopsis thaliana
1y7i	salicylic acid binding protein 2 (SA enzyme) from Nicotiana tabacum

## Sheet: PubChem
PubChem Accession number of 6 volatile compounds
6654	a-pinene
22311	limonene
31253	b-myrcene
5281515	b-caryophyllene
6557	isoprene
6549	linalool
