# Supplementary material for: A hypothesis on the capacity of plant odorant-binding proteins to bind volatile isoprenoids based on in silico evidences
Source: eLife. 2021 Jun 23;10:e66741. doi: 10.7554/eLife.66741 (PMC8221805; doi:10.7554/eLife.66741)
Supplement: Source data 2. — Related to Figure 1 and Table 2. [file elife-66741-data2.xlsx]

## Sheet: Autodock results
PROTEIN	LIGAND	RUN	ENERGY (kcal/mol)	N° in cluster	Ki	POSITION
TPL-LIKE	β-caryophillene	6	-6.2	17	28,46 μM	groove (3)-chain A
		46	-6.04	31	37,50 μM	groove (3)- chain B
	isoprene	87	-3.46	46	2,92 mM	Under groove (3) –chain A
		41	-3.45	25	2,95mM	Under groove (3) –chain B
		21	-3.04	16	5,94mM	groove (3)- chain A
	α-pinene	16	-5.06	68	173 μM	groove (3)- chain A
	limonene	47	-4.76	25	311,41 μM	groove (3)- chain B
		1	-4.76	32	356,48 μM	Under groove (3) –chain A
		88	-4.71	33	354,67 μM	LisH-CRA
	linalolo	76	-3.94	16	642,79 μM	groove (3)-chain A
		18	-3.76	18	945,79 μM	groove (3)- chain B
	myrcene	94	-3.95	17	855,72 μM	groove (3)-chain A
		49	-3.76	22	1,17 mM	groove (3)- chain B
		23	-3.77	24	1,10 mM	LisH-CRA
4DSB_A (ABA RECEPTOR)	ABA	75	-7.26	61	2,1 μM	Canonical ABA pocket
	β-caryophillene	90	-6.32	43	22,86 μM	Canonical ABA pocket
	α-pinene	17	-4.68	86	366,9 μM	Canonical ABA pocket
	limonene	1	-4.73	62	319,7 μM	Canonical ABA pocket
	linalolo	8	-4.12	30	457,50 μM	Canonical ABA pocket
	myrcene	66	-3.84	49	957,87 μM	Canonical ABA pocket
	isoprene	41	-3.35	47	3,14 mM	Canonical ABA pocket
3EBL_A (GA RECEPTOR)	GA	55	-9.31	50	121,92 nM	Canonical GA pocket
	β-CARYOPHILLENE	55	-6.94	83	7,30 μM	Canonical GA pocket
	α-pinene	43	-5.5	84	87,42 μM	Canonical GA pocket
	limonene	69	-5.44	28	82,39 μM	sito diffrente dalla tasca di legame
		50	-5.34	34	104,59 μM	ulteriore sito differente dalla tasca di legame
	linalolo	98	-4.69	29	166,34 μM	Canonical GA pocket
	myrcene	82	-4.1	33	699,55 μM	Canonical GA pocket
		8	-5.19	29	157,11 μM	si posiziona verso l'esterno della tasca di legame
3AXY (HD3A)	β-CARYOPHILLENE	96	-6.83	93	9,57 μM	tasca A
	α-pinene	7	-5.46	87	90,24 μM	tasca B
	limonene	93	-4.99	41	209,73 μM	tasca A
		66	-4.9	15	242,72 μM	tasca B
	linalolo	61	-4.96	23	147,07 μM	tasca B
		34	-4.72	36	241,47 μM	tasca A
	myrcene	81	-4.26	32	415,20 μM	tasca B
		10	-4.29	40	488,40 μM	tasca A
1WKP (FLOWERING LOCUS T)	β-CARYOPHILLENE	88	-6.65	62	13,22 μM	tasca A
		48	-6.2	24	28,48 μM	tasca B
	ISOPRENE	51	-3.15	80	4,61 mM	tasca C
	α-pinene	45	-5.14	7	139,67 μM	tasca C
		89	-5.23	77	143,49 μM	tasca B
	limonene	54	-5.07	47	181,16 μM	tasca A
		28	-4.82	20	234,45μM	tasca C
		93	-4.77	17	312,82 μM	tasca B
	linalolo	100	-4.98	27	224,96 μM	tasca A
		11	-4.64	18	256,30 μM	tasca B
	myrcene	35	-4.26	23	473,68 μM	tasca C
		24 (+33)	-4.25	22 (+17)	513,11 μM	tasca A
		53	-4.09	21	770,36 μM	tasca B
1WKO (TFL1)	β-CARYOPHILLENE	11	-7.15	38	5,57 μM	tasca A
		5	-6.91	59	120,59 μM	tasca B
	α-pinene	74	-5.3	73	120,59 μM	tasca A
		69	-4.86	14	272,98 μM	tasca B
	limonene	66	-5.53	44	77,4 μM	ulteriore sito
		72	-5.12	19	161,41 μM	tasca A
		92	-4.88	22	251,03 μM	tasca B
	linalolo	79	-4.98	16 (+5+11+4+1)	99,74 μM	tasca A
		96 (+1)	-4.68	22 (+16)	251 μM	tasca B
	myrcene	97	-4.35	29	442,69 μM	tasca A
		68	-4	31	911,60 μM	tasca B
COI (partial JM receptor)	JM-Ile	7	-4.54	1	65,30 μM	Canonical JM pocket
	β-caryophillene	54	-6.05	10	33,18 μM	Canonical JM pocket
	isoprene	74	-2.78	2	8,90 mM	Canonical JM pocket
	α-pinene	71	-5.23	16	130,15 μM	Canonical JM pocket
		39	-5	46	206,18 μM	ulteriore tasca (tasca A)
	limonene	23 (+10)	-4.79	25 (+19)	228,74 μM	tasca A
		70	-4.68	21	333,01 μM	Canonical JM pocket
	linalolo	99	-4.21	24	278,52 μM	ulteriore sito
		35	-3.91	7	903,47 μM	Canonical JM pocket
	myrcene	67	-4.16	36	571,25 μM	tasca A
		37	-3.82	18	1,09 mM	Canonical JM pocket
COI & JAZ (JM receptor complete)	JM-Ile	nessun risultato per la tasca canonica!
	β-caryophillene	29	-6.57	9	15,04 μM	Canonical JM pocket
		43	-6.61	38	13,50 μM	tasca A
	isoprene	78	-2.82	2	8,29 mM	Canonical JM pocket
	α-pinene	76	-5.92	59	38,55 μM	ulteriore sito
		44 (+17)	-5.39	14 (+1)	94,57 μM	Canonical JM pocket
		5	-5.11	15	176,86 μM	tasca A
	limonene	1	-5.11	38	321,92 μM	Canonical JM pocket
	linalolo	14	-4.49	25	142,75 μM	Canonical JM pocket
	myrcene	69	-4.41	40	321,92 μM	Canonical JM pocket
		47	-4.23	28	408,11 μM	tasca A
SABP2 (SA enzyme)	SA	92	-5.37	34	97,25 μM	Canonical SA binding pocket
	β-caryophillene	3	-6.73	3	11,21 μM	Canonical SA binding pocket
		77	-5.71	77	64,92 μM	ulteriore sito (tasca B)
	isoprene	63	-3.25	3	3,65 mM	Canonical SA binding pocket
		58	-3.24	91	4,06 mM	più esterno rispetto alla tasca di legme
	α-pinene	61	-6.03	57	37,39 μM	Canonical SA binding pocket
		8	-4.82	33	290,7 μM	tasca B
	limonene	50 (+29)	-6.12	78	31,49 μM	Canonical SA binding pocket
			-4.32	16	629,66 μM	tasca B
	linalolo	58	-4.7	17 (+7+2+1)	208,22 μM	Canonical SA binding pocket
		39	-3.86	28	2,01 mM	tasca B
	myrcene	41(+28)	-5.14	57 (+14)	104,29 μM	Canonical SA binding pocket
		73	-3.75	27	1,04 mM	tasca B
